# Supplementary material for: Global, regional and national burden of disease attributable to 19 selected occupational risk factors for 183 countries, 2000–2016: A systematic analysis from the WHO/ILO Joint Estimates of the Work-related Burden of Disease and Injury
Source: PubMed Central journal article supplement (PMC9045235; doi:10.5271/sjweh.4001), 2022-02-25
Supplement: SJWEH-48-158-S001.pdf [file SJWEH-48-158-S001.pdf]

# Global, regional and national burden of disease attributable to 19 selected occupational risk factors for 183 countries, 2000–2016: A systematic analysis from the WHO/ILO Joint Estimates of the Work-related Burden of Disease and Injury<sup>1</sup>

by Frank Pega, PhD,<sup>2</sup> Halim Hamzaoui, MD, Bálint Náfrádi, PhD, Natalie C Momen, PhD

1. Supplementary table
2. Corresponding author: Dr Frank Pega, Department of Environment, Climate Change and Health, World Health Organization, Avenue Appia 20, 1211 Geneva 27, Switzerland. [E-mail: pegaf@who.int]

**Table S1.** Total numbers of attributable deaths and DALYs, and numbers of death and DALY per 100 000 of the working-age population ( $\geq 15$  years), globally and by WHO region and country, 183 countries, for 2000, 2010 and 2016

|                              | No. deaths |           |           | No. deaths per 100 000 working-age population ( $\geq 15$ years) |      |      | No. DALYs  |            |            | No. DALYs per 100 000 working-age population ( $\geq 15$ years) |         |         |
|------------------------------|------------|-----------|-----------|------------------------------------------------------------------|------|------|------------|------------|------------|-----------------------------------------------------------------|---------|---------|
|                              | 2000       | 2010      | 2016      | 2000                                                             | 2010 | 2016 | 2000       | 2010       | 2016       | 2000                                                            | 2010    | 2016    |
| Global                       | 1 701 976  | 1 762 975 | 1 879 890 | 39.9                                                             | 34.9 | 34.3 | 80 048 208 | 83 637 261 | 89 716 654 | 1 878.4                                                         | 1 657.7 | 1 635.9 |
| African Region               | 115 547    | 132 350   | 150 427   | 31.2                                                             | 27.1 | 25.9 | 7 962 057  | 9 462 719  | 10 846 723 | 2 147.2                                                         | 1 935.1 | 1 867.1 |
| Region of the Americas       | 163 799    | 163 549   | 169 238   | 27.5                                                             | 23.4 | 22.3 | 7 531 962  | 77 70 545  | 8 134 604  | 1 265.3                                                         | 1 112.3 | 1 071.8 |
| South-East Asia Region       | 503 777    | 565 746   | 634 096   | 48.3                                                             | 44.6 | 45.0 | 24 613 276 | 26 699 718 | 29 573 376 | 2 362.1                                                         | 2 104.2 | 2 099.2 |
| European Region              | 251 306    | 239 935   | 229 262   | 36.2                                                             | 32.5 | 30.4 | 10 709 047 | 10 081 919 | 9 631 762  | 1 543.3                                                         | 1 365.2 | 1 276.9 |
| Eastern Mediterranean Region | 96 516     | 111 779   | 121 725   | 33.7                                                             | 28.9 | 27.2 | 4 741 158  | 5 613 679  | 6 139 952  | 1 654.3                                                         | 1 450.6 | 1 371.7 |
| Western Pacific Region       | 571 031    | 549 616   | 575 142   | 44.9                                                             | 37.6 | 37.5 | 24 490 708 | 24 008 682 | 25 390 237 | 1 924.0                                                         | 1 640.6 | 1 655.5 |
| Afghanistan                  | 5 096      | 6 334     | 6 747     | 48.0                                                             | 41.9 | 34.2 | 289 729    | 347 281    | 375 992    | 2 728.2                                                         | 2 296.2 | 1 906.8 |
| Albania                      | 504        | 543       | 561       | 23.1                                                             | 23.8 | 23.8 | 34 351     | 34 633     | 33 905     | 1 575.7                                                         | 1 515.0 | 1 439.2 |
| Algeria                      | 5 067      | 5 160     | 5 630     | 24.9                                                             | 19.7 | 19.6 | 264 668    | 293 440    | 318 879    | 1 299.0                                                         | 1 121.6 | 1 109.6 |
| Angola                       | 2 906      | 2 715     | 3 274     | 33.6                                                             | 21.9 | 21.4 | 188 819    | 184 452    | 219 226    | 2 181.2                                                         | 1 491.2 | 1 435.6 |
| Antigua and Barbuda          | 2          | 2         | 1         | 3.7                                                              | 3.0  | 1.4  | 476        | 544        | 604        | 878.2                                                           | 816.8   | 823.5   |
| Argentina                    | 9 851      | 9 885     | 9 478     | 37.3                                                             | 32.7 | 29.1 | 442 118    | 453 774    | 464 847    | 1 676.2                                                         | 1 500.2 | 1 426.1 |
| Armenia                      | 715        | 716       | 677       | 31.4                                                             | 30.9 | 28.9 | 39 014     | 37 648     | 37 452     | 1 713.2                                                         | 1 624.6 | 1 599.6 |
| Australia                    | 5 463      | 5 663     | 5 812     | 36.4                                                             | 31.6 | 29.6 | 190 284    | 200 317    | 205 576    | 1 266.4                                                         | 1 116.7 | 1 045.4 |
| Austria                      | 1 803      | 1 814     | 1 826     | 26.9                                                             | 25.3 | 24.3 | 76 371     | 78 109     | 79 772     | 1 137.9                                                         | 1 089.0 | 1 062.5 |
| Azerbaijan                   | 1 188      | 1 260     | 1 280     | 21.2                                                             | 18.1 | 17.1 | 70 734     | 86 014     | 93 144     | 1 264.8                                                         | 1 234.1 | 1 244.7 |
| Bahamas                      | 14         | 19        | 20        | 6.6                                                              | 7.3  | 6.9  | 1 509      | 1 872      | 2 075      | 716.2                                                           | 721.3   | 716.3   |
| Bahrain                      | 57         | 87        | 96        | 12.3                                                             | 8.8  | 8.5  | 4 414      | 10 497     | 11 549     | 950.7                                                           | 1 061.6 | 1 017.7 |
| Bangladesh                   | 35 180     | 43 094    | 49 234    | 43.7                                                             | 42.9 | 43.7 | 2 113 177  | 2 320 878  | 2 613 020  | 2 625.7                                                         | 2 312.3 | 2 321.6 |
| Barbados                     | 33         | 30        | 31        | 15.5                                                             | 13.2 | 13.2 | 1 893      | 2 043      | 2 101      | 891.7                                                           | 902.3   | 896.0   |
| Belarus                      | 3 556      | 2 894     | 2 162     | 44.2                                                             | 36.1 | 27.4 | 145 589    | 126 049    | 105 603    | 1 810.2                                                         | 1 572.2 | 1 339.2 |
| Belgium                      | 3 736      | 3 840     | 3 528     | 44.1                                                             | 42.2 | 37.4 | 114 448    | 113 854    | 108 282    | 1 350.3                                                         | 1 252.2 | 1 149.2 |

|                                       |         |         |         |      |      |      |            |            |            |         |         |         |
|---------------------------------------|---------|---------|---------|------|------|------|------------|------------|------------|---------|---------|---------|
| Belize                                | 21      | 22      | 27      | 14.3 | 10.6 | 10.7 | 1 788      | 2 174      | 2 687      | 1 220.1 | 1 047.1 | 1 065.1 |
| Benin                                 | 796     | 1 132   | 1 361   | 21.1 | 21.9 | 21.9 | 58 280     | 82 650     | 96 122     | 1 547.2 | 1 600.0 | 1 547.5 |
| Bhutan                                | 176     | 190     | 204     | 49.5 | 40.3 | 37.8 | 10 552     | 12 410     | 13 533     | 2 966.5 | 2 630.3 | 2 507.5 |
| Bolivia (Plurinational State of)      | 1 717   | 1 713   | 1 867   | 32.8 | 26.0 | 24.9 | 88 875     | 97 184     | 105 489    | 1 695.7 | 1 476.3 | 1 405.9 |
| Bosnia and Herzegovina                | 883     | 784     | 670     | 29.7 | 25.1 | 23.3 | 46 667     | 40 391     | 36 453     | 1 569.0 | 1 293.6 | 1 265.3 |
| Botswana                              | 199     | 248     | 259     | 19.7 | 19.2 | 18.4 | 14 343     | 16 584     | 17 634     | 1 422.8 | 1 283.3 | 1 250.5 |
| Brazil                                | 29 184  | 28 594  | 28 355  | 23.8 | 19.4 | 17.6 | 1 604 011  | 1 678 162  | 1 703 521  | 1 309.8 | 1 140.6 | 1 060.0 |
| Brunei Darussalam                     | 21      | 21      | 32      | 9.1  | 7.3  | 10.0 | 3 260      | 3 226      | 3 824      | 1 411.1 | 1 121.1 | 1 196.8 |
| Bulgaria                              | 1 146   | 1 084   | 961     | 17.0 | 16.9 | 15.7 | 63 754     | 62 655     | 57 788     | 945.1   | 975.5   | 943.0   |
| Burkina Faso                          | 1 355   | 1 690   | 1 869   | 21.9 | 20.1 | 18.4 | 102 415    | 133 536    | 149 784    | 1 657.5 | 1 591.2 | 1 470.9 |
| Burundi                               | 878     | 1 662   | 2 067   | 27.6 | 34.9 | 36.2 | 66 990     | 127 232    | 158 553    | 2 103.4 | 2 673.3 | 2 777.0 |
| Cabo Verde                            | 45      | 47      | 40      | 18.4 | 14.1 | 10.7 | 3 217      | 3 547      | 3 654      | 1 317.3 | 1 063.7 | 976.9   |
| Cambodia                              | 2 631   | 2 928   | 3 179   | 37.1 | 30.7 | 29.4 | 161 796    | 184 479    | 198 659    | 2 278.9 | 1 933.2 | 1 836.5 |
| Cameroon                              | 1 960   | 2 365   | 2 874   | 23.0 | 20.6 | 21.1 | 149 207    | 182 193    | 213 018    | 1 751.5 | 1 590.6 | 1 563.7 |
| Canada                                | 8 709   | 9 077   | 9 266   | 35.2 | 31.8 | 30.3 | 343 861    | 346 419    | 351 220    | 1 390.7 | 1 214.8 | 1 147.8 |
| Central African Republic              | 698     | 680     | 594     | 33.8 | 27.7 | 23.8 | 43 286     | 43 058     | 42 668     | 2 096.2 | 1 754.5 | 1 708.2 |
| Chad                                  | 1 704   | 2 208   | 2 536   | 39.9 | 36.1 | 33.3 | 114 071    | 151 235    | 176 585    | 2 670.2 | 2 469.8 | 2 316.0 |
| Chile                                 | 1 753   | 2 118   | 2 168   | 15.7 | 15.9 | 14.9 | 104 783    | 129 468    | 136 739    | 939.8   | 973.8   | 942.2   |
| China                                 | 479 454 | 442 898 | 460 257 | 49.4 | 39.8 | 39.7 | 19 905 168 | 18 973 358 | 20 011 944 | 2 050.7 | 1 704.1 | 1 725.8 |
| Colombia                              | 5 874   | 6 193   | 6 719   | 22.0 | 18.8 | 18.4 | 290 039    | 316 957    | 336 312    | 1 085.4 | 963.7   | 919.1   |
| Comoros                               | 50      | 64      | 80      | 16.5 | 15.7 | 16.8 | 6 626      | 8 346      | 9 624      | 2 180.7 | 2 052.5 | 2 015.3 |
| Congo                                 | 413     | 452     | 434     | 22.8 | 18.1 | 15.0 | 29 251     | 34 088     | 33 838     | 1 617.2 | 1 366.6 | 1 172.8 |
| Costa Rica                            | 474     | 500     | 519     | 17.4 | 14.4 | 13.6 | 27 303     | 30 710     | 31 768     | 1 001.0 | 886.4   | 829.7   |
| Côte d'Ivoire                         | 3 091   | 4 476   | 5 158   | 33.3 | 38.7 | 37.6 | 185 261    | 264 692    | 302 549    | 1 997.4 | 2 286.5 | 2 204.1 |
| Croatia                               | 1 001   | 1 277   | 1 212   | 27.3 | 34.9 | 33.7 | 45 154     | 48 915     | 44 554     | 1 233.4 | 1 336.6 | 1 237.2 |
| Cuba                                  | 3 005   | 3 446   | 3 349   | 34.4 | 37.3 | 35.4 | 147 706    | 178 810    | 172 179    | 1 692.9 | 1 936.4 | 1 820.7 |
| Cyprus                                | 155     | 169     | 170     | 21.2 | 18.5 | 17.5 | 7 143      | 8 383      | 8 117      | 975.8   | 917.0   | 834.4   |
| Czechia                               | 2 022   | 1 781   | 1 707   | 23.5 | 19.7 | 19.0 | 108 098    | 103 119    | 103 276    | 1 257.0 | 1 141.2 | 1 147.0 |
| Democratic People's Republic of Korea | 9 540   | 14 832  | 15 953  | 56.2 | 78.1 | 79.5 | 417 288    | 553 070    | 576 494    | 2 457.3 | 2 912.2 | 2 872.6 |
| Democratic Republic of the Congo      | 8 562   | 11 098  | 12 179  | 33.4 | 31.9 | 28.8 | 610 866    | 801 958    | 896 504    | 2 381.2 | 2 306.2 | 2 120.7 |
| Denmark                               | 1 828   | 1 801   | 1 849   | 42.0 | 39.5 | 38.8 | 64 261     | 62 569     | 63 585     | 1 475.7 | 1 372.8 | 1 334.9 |
| Djibouti                              | 66      | 85      | 114     | 15.6 | 15.0 | 17.6 | 6 737      | 7 998      | 9 778      | 1 590.6 | 1 411.6 | 1 510.6 |
| Dominican Republic                    | 1 464   | 1 626   | 1 750   | 26.6 | 24.2 | 23.6 | 84 680     | 94 187     | 100 823    | 1 535.8 | 1 400.0 | 1 356.8 |
| Ecuador                               | 1 886   | 1 753   | 2 030   | 22.9 | 16.9 | 17.3 | 112 494    | 113 496    | 127 965    | 1 364.1 | 1 096.4 | 1 088.4 |
| Egypt                                 | 12 536  | 17 136  | 19 599  | 28.8 | 30.7 | 31.3 | 547 274    | 767 434    | 869 717    | 1 259.2 | 1 374.9 | 1 387.8 |
| El Salvador                           | 636     | 444     | 476     | 17.0 | 10.5 | 10.4 | 36 192     | 27 456     | 29 665     | 970.2   | 649.5   | 646.9   |
| Equatorial Guinea                     | 118     | 139     | 171     | 32.8 | 24.0 | 22.5 | 8 506      | 10 055     | 11 731     | 2 364.2 | 1 732.7 | 1 543.3 |
| Eritrea                               | 556     | 636     | 637     | 44.7 | 33.1 | 32.6 | 33 555     | 41 093     | 42 895     | 2 696.2 | 2 141.8 | 2 192.7 |
| Estonia                               | 245     | 180     | 154     | 21.2 | 15.9 | 13.9 | 14 121     | 10 865     | 9 790      | 1 224.6 | 961.1   | 886.7   |
| Eswatini                              | 91      | 99      | 100     | 15.9 | 15.5 | 14.6 | 6 097      | 5 950      | 6 811      | 1 064.0 | 934.2   | 996.5   |
| Ethiopia                              | 14 504  | 17 343  | 21 841  | 40.9 | 35.9 | 36.2 | 1 090 203  | 1 335 548  | 1 676 235  | 3 074.9 | 2 767.3 | 2 776.2 |
| Fiji                                  | 158     | 138     | 131     | 30.0 | 22.6 | 21.4 | 9 082      | 8 445      | 8 120      | 1 723.7 | 1 383.4 | 1 324.8 |
| Finland                               | 1 076   | 1 124   | 1 089   | 25.3 | 25.1 | 23.7 | 45 244     | 44 577     | 44 022     | 1 065.3 | 995.2   | 957.1   |
| France                                | 14 321  | 16 232  | 17 209  | 29.9 | 31.7 | 32.6 | 577 533    | 648 275    | 661 506    | 1 206.8 | 1 264.7 | 1 251.2 |

|                                  |         |         |         |      |      |      |            |            |            |         |         |         |
|----------------------------------|---------|---------|---------|------|------|------|------------|------------|------------|---------|---------|---------|
| Gabon                            | 129     | 129     | 146     | 17.8 | 12.7 | 11.5 | 8 492      | 9 629      | 10 694     | 1 172.1 | 947.6   | 839.9   |
| Gambia                           | 196     | 217     | 235     | 28.1 | 22.1 | 19.7 | 13 523     | 14 863     | 16 361     | 1 939.0 | 1 511.0 | 1 370.5 |
| Georgia                          | 1 333   | 1 448   | 1 397   | 38.6 | 43.1 | 43.1 | 68 165     | 64 079     | 56 683     | 1 973.6 | 1 905.4 | 1 748.2 |
| Germany                          | 22 811  | 23 728  | 24 294  | 33.2 | 34.0 | 34.1 | 881 259    | 857 368    | 867 764    | 1 283.8 | 1 227.3 | 1 217.9 |
| Ghana                            | 1 988   | 2 744   | 3 028   | 17.9 | 18.2 | 17.2 | 137 257    | 176 780    | 201 021    | 1 237.2 | 1 175.0 | 1 138.8 |
| Greece                           | 2 561   | 2 462   | 2 384   | 27.2 | 26.6 | 26.2 | 108 150    | 100 552    | 94 420     | 1 149.2 | 1 087.2 | 1 038.6 |
| Grenada                          | 7       | 5       | 5       | 10.2 | 6.2  | 5.9  | 651        | 664        | 660        | 950.4   | 822.1   | 779.7   |
| Guatemala                        | 1 556   | 1 599   | 1 804   | 23.7 | 18.0 | 16.9 | 105 088    | 108 102    | 122 161    | 1 603.0 | 1 218.6 | 1 144.9 |
| Guinea                           | 1 666   | 2 007   | 2 094   | 37.7 | 36.6 | 32.2 | 118 620    | 140 298    | 148 097    | 2 687.2 | 2 557.4 | 2 279.1 |
| Guinea-Bissau                    | 125     | 127     | 132     | 19.1 | 14.7 | 12.9 | 10 208     | 11 539     | 12 779     | 1 556.7 | 1 333.0 | 1 249.0 |
| Guyana                           | 104     | 110     | 128     | 21.6 | 21.7 | 23.4 | 6 206      | 6 314      | 7 112      | 1 291.6 | 1 242.9 | 1 297.9 |
| Haiti                            | 1 370   | 1 314   | 1 817   | 27.1 | 20.7 | 25.4 | 62 962     | 68 735     | 86 877     | 1 244.9 | 1 084.0 | 1 214.4 |
| Honduras                         | 593     | 721     | 964     | 15.8 | 13.9 | 15.5 | 39 784     | 49 401     | 63 060     | 1 058.3 | 951.5   | 1 015.2 |
| Hungary                          | 1 951   | 1 840   | 1 897   | 23.0 | 21.8 | 22.7 | 94 303     | 87 722     | 90 360     | 1 109.4 | 1 037.9 | 1 082.0 |
| Iceland                          | 49      | 63      | 57      | 22.8 | 24.8 | 21.5 | 2 965      | 3 075      | 3 036      | 1 376.7 | 1 212.0 | 1 144.4 |
| India                            | 345 418 | 370 599 | 416 910 | 50.1 | 43.4 | 43.7 | 16 285 249 | 16 893 968 | 18 850 632 | 2 361.3 | 1 978.2 | 1 974.8 |
| Indonesia                        | 73 328  | 90 778  | 102 523 | 50.0 | 52.7 | 53.9 | 3 678 072  | 4 505 634  | 4 985 614  | 2 509.0 | 2 617.8 | 2 619.5 |
| Iran (Islamic Republic of)       | 11 557  | 12 038  | 11 303  | 26.7 | 21.5 | 18.7 | 551 469    | 574 026    | 563 881    | 1 272.6 | 1 024.6 | 932.9   |
| Iraq                             | 2 927   | 3 644   | 4 486   | 21.8 | 21.1 | 20.1 | 142 952    | 200 919    | 264 512    | 1 066.0 | 1 160.8 | 1 186.4 |
| Ireland                          | 960     | 748     | 808     | 32.3 | 20.7 | 22.0 | 35 044     | 33 707     | 35 134     | 1 179.5 | 934.3   | 956.2   |
| Israel                           | 659     | 679     | 716     | 15.4 | 12.7 | 12.3 | 32 912     | 39 016     | 42 289     | 769.6   | 730.2   | 723.6   |
| Italy                            | 18 476  | 20 058  | 20 010  | 38.0 | 39.4 | 38.2 | 618 868    | 617 513    | 613 696    | 1 274.1 | 1 211.5 | 1 171.0 |
| Jamaica                          | 390     | 307     | 323     | 21.7 | 15.0 | 14.7 | 20 523     | 17 788     | 18 408     | 1 139.4 | 867.2   | 836.8   |
| Japan                            | 33 115  | 37 853  | 38 439  | 30.5 | 34.0 | 34.5 | 1 461 835  | 1 411 556  | 1 373 425  | 1 345.2 | 1 267.4 | 1 234.4 |
| Jordan                           | 656     | 878     | 1 172   | 21.2 | 19.3 | 19.0 | 32 364     | 44 998     | 58 021     | 1 046.3 | 991.1   | 941.0   |
| Kazakhstan                       | 4 818   | 4 380   | 4 011   | 44.5 | 35.5 | 30.9 | 230 428    | 218 932    | 211 893    | 2 130.6 | 1 773.8 | 1 634.8 |
| Kenya                            | 3 575   | 3 008   | 3 845   | 20.4 | 12.7 | 13.3 | 329 257    | 328 532    | 406 006    | 1 881.3 | 1 382.0 | 1 400.6 |
| Kiribati                         | 3       | 5       | 9       | 5.9  | 7.6  | 12.3 | 649        | 830        | 923        | 1 281.1 | 1 262.0 | 1 260.1 |
| Kuwait                           | 225     | 405     | 626     | 15.4 | 17.6 | 20.1 | 17 174     | 28 599     | 41 028     | 1 172.5 | 1 244.9 | 1 317.5 |
| Kyrgyzstan                       | 1 027   | 1 022   | 976     | 32.1 | 26.9 | 23.6 | 51 052     | 54 290     | 55 493     | 1 594.7 | 1 428.2 | 1 341.9 |
| Lao People's Democratic Republic | 1 239   | 1 409   | 1 504   | 41.1 | 35.5 | 32.9 | 64 532     | 73 471     | 80 643     | 2 140.1 | 1 849.5 | 1 763.6 |
| Latvia                           | 751     | 553     | 411     | 38.3 | 30.4 | 24.6 | 33 369     | 25 458     | 20 663     | 1 703.9 | 1 398.5 | 1 234.6 |
| Lebanon                          | 768     | 958     | 1 277   | 29.0 | 26.1 | 26.1 | 34 959     | 43 180     | 58 528     | 1 320.3 | 1 175.2 | 1 194.0 |
| Lesotho                          | 270     | 284     | 288     | 22.1 | 21.9 | 20.8 | 14 086     | 12 915     | 13 671     | 1 155.1 | 993.9   | 986.6   |
| Liberia                          | 434     | 595     | 627     | 26.6 | 26.8 | 23.5 | 29 410     | 38 854     | 43 262     | 1 801.7 | 1 752.8 | 1 620.7 |
| Libya                            | 804     | 877     | 899     | 22.7 | 19.9 | 19.4 | 39 482     | 43 334     | 43 869     | 1 114.0 | 981.4   | 948.0   |
| Lithuania                        | 861     | 764     | 589     | 30.7 | 28.7 | 23.9 | 41 581     | 35 348     | 29 284     | 1 485.0 | 1 327.6 | 1 187.3 |
| Luxembourg                       | 88      | 94      | 96      | 24.9 | 22.5 | 19.8 | 3 861      | 3 997      | 4 323      | 1 092.3 | 955.6   | 891.0   |
| Madagascar                       | 4 240   | 5 504   | 5 572   | 49.0 | 46.1 | 38.1 | 271 668    | 371 771    | 391 327    | 3 141.5 | 3 112.1 | 2 677.7 |
| Malawi                           | 1 962   | 1 666   | 1 954   | 32.6 | 21.4 | 20.5 | 140 849    | 138 567    | 164 077    | 2 343.0 | 1 776.4 | 1 724.0 |
| Malaysia                         | 3 948   | 4 491   | 4 982   | 25.5 | 22.1 | 21.6 | 207 414    | 242 120    | 268 837    | 1 341.8 | 1 191.5 | 1 163.8 |
| Maldives                         | 43      | 37      | 36      | 25.9 | 13.5 | 9.6  | 2 420      | 2 427      | 2 598      | 1 454.9 | 888.3   | 689.2   |
| Mali                             | 2 097   | 2 545   | 2 915   | 35.9 | 32.2 | 31.1 | 134 726    | 176 769    | 202 754    | 2 303.4 | 2 236.8 | 2 164.3 |
| Malta                            | 66      | 75      | 95      | 20.9 | 21.3 | 25.4 | 3 508      | 3 846      | 4 039      | 1 111.9 | 1 092.1 | 1 079.6 |
| Mauritania                       | 223     | 297     | 369     | 15.0 | 14.5 | 14.9 | 17 095     | 23 142     | 26 794     | 1 151.2 | 1 127.3 | 1 079.9 |
| Mauritius                        | 170     | 136     | 170     | 19.3 | 14.0 | 16.6 | 9 277      | 8 824      | 9 772      | 1 054.3 | 905.9   | 954.9   |

|                                  |        |        |        |      |      |      |           |           |           |         |         |         |
|----------------------------------|--------|--------|--------|------|------|------|-----------|-----------|-----------|---------|---------|---------|
| Mexico                           | 13 364 | 15 570 | 16 452 | 20.5 | 19.4 | 18.3 | 766 404   | 833 132   | 892 709   | 1 177.6 | 1 035.9 | 995.7   |
| Micronesia (Federated States of) | 2      | 6      | 5      | 3.1  | 9.1  | 6.7  | 873       | 786       | 807       | 1 362.7 | 1 187.5 | 1 082.0 |
| Mongolia                         | 612    | 665    | 715    | 39.1 | 33.5 | 33.2 | 30 406    | 36 217    | 39 180    | 1 944.4 | 1 824.6 | 1 816.6 |
| Montenegro                       | 84     | 80     | 73     | 17.4 | 15.9 | 14.3 | 5 447     | 4 959     | 4 861     | 1 130.1 | 983.6   | 948.9   |
| Morocco                          | 6 619  | 5 046  | 4 933  | 34.6 | 21.8 | 19.4 | 336 180   | 302 909   | 304 496   | 1 755.4 | 1 310.1 | 1 198.0 |
| Mozambique                       | 3 882  | 2 912  | 2 741  | 39.5 | 22.8 | 18.0 | 272 514   | 238 726   | 242 743   | 2 772.4 | 1 869.4 | 1 592.1 |
| Myanmar                          | 10 606 | 13 456 | 15 140 | 33.6 | 38.0 | 39.3 | 505 414   | 636 153   | 707 994   | 1 603.0 | 1 797.2 | 1 836.7 |
| Namibia                          | 181    | 180    | 197    | 17.4 | 13.6 | 13.2 | 11 141    | 12 703    | 14 229    | 1 070.8 | 957.9   | 955.9   |
| Nepal                            | 9 185  | 9 500  | 9 726  | 65.0 | 55.2 | 52.7 | 492 447   | 466 409   | 472 163   | 3 484.2 | 2 710.0 | 2 558.2 |
| Netherlands                      | 5 589  | 5 506  | 5 621  | 43.0 | 40.0 | 39.7 | 181 011   | 178 240   | 179 292   | 1 394.0 | 1 295.4 | 1 265.6 |
| New Zealand                      | 1 036  | 1 051  | 1 016  | 34.7 | 30.3 | 27.2 | 41 775    | 43 539    | 43 601    | 1 400.7 | 1 253.2 | 1 167.0 |
| Nicaragua                        | 527    | 576    | 633    | 17.2 | 14.8 | 14.5 | 33 912    | 39 876    | 43 902    | 1 108.6 | 1 026.8 | 1 007.9 |
| Niger                            | 1 872  | 3 106  | 3 457  | 31.9 | 37.8 | 33.4 | 137 139   | 216 112   | 241 770   | 2 339.8 | 2 627.2 | 2 333.3 |
| Nigeria                          | 18 343 | 21 279 | 24 461 | 26.6 | 24.0 | 23.5 | 1 330 528 | 1 558 318 | 1 757 639 | 1 929.3 | 1 756.7 | 1 691.0 |
| North Macedonia                  | 290    | 288    | 281    | 18.4 | 16.9 | 16.2 | 16 147    | 17 124    | 17 069    | 1 026.3 | 1 007.3 | 985.7   |
| Norway                           | 935    | 1 053  | 1 006  | 26.0 | 26.5 | 23.3 | 38 140    | 40 849    | 40 092    | 1 059.4 | 1 029.8 | 928.9   |
| Oman                             | 261    | 300    | 418    | 18.3 | 13.3 | 11.9 | 15 463    | 19 637    | 32 168    | 1 084.0 | 868.8   | 919.1   |
| Pakistan                         | 32 481 | 37 237 | 41 045 | 39.3 | 33.3 | 31.3 | 1 497 441 | 1 715 934 | 1 890 025 | 1 812.6 | 1 535.0 | 1 443.4 |
| Panama                           | 324    | 346    | 352    | 15.7 | 13.4 | 12.0 | 20 525    | 21 531    | 22 392    | 995.8   | 834.0   | 766.1   |
| Papua New Guinea                 | 878    | 966    | 1 257  | 24.9 | 21.4 | 23.9 | 48 553    | 55 406    | 67 829    | 1 378.4 | 1 228.4 | 1 290.6 |
| Paraguay                         | 938    | 976    | 1 078  | 28.6 | 23.3 | 22.7 | 57 839    | 60 871    | 66 917    | 1 766.0 | 1 452.7 | 1 410.9 |
| Peru                             | 3 570  | 3 856  | 4 250  | 20.6 | 19.0 | 18.9 | 196 057   | 229 906   | 256 021   | 1 130.2 | 1 133.0 | 1 135.6 |
| Philippines                      | 13 577 | 22 168 | 26 635 | 28.3 | 35.7 | 37.7 | 784 393   | 1 108 527 | 1 286 094 | 1 634.5 | 1 787.2 | 1 822.4 |
| Poland                           | 7 454  | 8 637  | 9 174  | 24.0 | 26.6 | 28.3 | 395 050   | 408 363   | 412 287   | 1 273.7 | 1 256.6 | 1 273.6 |
| Portugal                         | 2 643  | 2 159  | 1 910  | 30.6 | 24.0 | 21.5 | 116 466   | 102 759   | 96 018    | 1 347.0 | 1 140.5 | 1 079.7 |
| Qatar                            | 40     | 138    | 227    | 9.1  | 8.5  | 9.9  | 4 792     | 16 354    | 22 616    | 1 088.9 | 1 011.3 | 985.0   |
| Republic of Korea                | 11 345 | 9 642  | 9 105  | 30.2 | 23.2 | 20.6 | 658 929   | 606 062   | 591 949   | 1 751.9 | 1 458.0 | 1 342.2 |
| Republic of Moldova              | 851    | 792    | 602    | 26.5 | 23.2 | 17.6 | 45 382    | 40 485    | 34 682    | 1 410.7 | 1 186.8 | 1012.9  |
| Romania                          | 7 011  | 5 586  | 4 754  | 38.9 | 32.4 | 28.4 | 349 360   | 269 904   | 239 628   | 1 938.5 | 1 565.4 | 1 431.2 |
| Russian Federation               | 51 714 | 40 001 | 33 976 | 43.2 | 32.8 | 28.3 | 2 349 918 | 1 942 360 | 1 749 394 | 1 963.3 | 1 591.3 | 1 455.9 |
| Rwanda                           | 1 466  | 1 262  | 1 450  | 33.2 | 21.5 | 20.8 | 110 101   | 113 349   | 131 244   | 2 494.8 | 1 931.3 | 1 884.7 |
| Saint Lucia                      | 15     | 11     | 14     | 14.1 | 8.2  | 9.6  | 1 072     | 1 209     | 1 330     | 1 010.1 | 904.4   | 915.8   |
| Saint Vincent and the Grenadines | 2      | 6      | 8      | 2.7  | 7.5  | 9.5  | 501       | 637       | 732       | 678.4   | 793.3   | 872.5   |
| Samoa                            | 20     | 16     | 13     | 19.4 | 13.9 | 10.9 | 1 790     | 1 423     | 1 340     | 1 731.9 | 1 240.5 | 1 122.8 |
| Sao Tome and Principe            | 5      | 3      | 4      | 6.3  | 2.9  | 3.5  | 876       | 1 067     | 1 231     | 1 106.9 | 1 045.2 | 1 065.2 |
| Saudi Arabia                     | 2 614  | 3 209  | 3 866  | 20.5 | 16.6 | 16.0 | 143 477   | 185 020   | 221 468   | 1 124.8 | 959.8   | 916.6   |
| Senegal                          | 1 211  | 1 490  | 1 503  | 22.4 | 20.8 | 17.7 | 82 072    | 104 392   | 112 013   | 1 515.0 | 1 457.5 | 1 319.4 |
| Serbia                           | 2 464  | 2 128  | 1 873  | 32.7 | 28.6 | 25.2 | 115 143   | 100 454   | 91 331    | 1 526.5 | 1 351.5 | 1 227.7 |
| Seychelles                       | 0      | 0      | 4      | 0.0  | 0.0  | 5.5  | 727       | 886       | 899       | 1 257.9 | 1 257.6 | 1 224.9 |
| Sierra Leone                     | 1 562  | 1 631  | 1 710  | 61.0 | 44.6 | 40.0 | 80 382    | 89 275    | 95 246    | 3 140.4 | 2 442.9 | 2 226.7 |
| Singapore                        | 788    | 776    | 803    | 24.1 | 17.6 | 16.2 | 36 530    | 37 665    | 39 081    | 1 115.4 | 853.5   | 788.1   |
| Slovakia                         | 569    | 520    | 506    | 13.1 | 11.4 | 11.0 | 37 008    | 36 659    | 36 405    | 853.7   | 801.2   | 789.4   |
| Slovenia                         | 481    | 509    | 496    | 28.7 | 29.0 | 28.1 | 22 398    | 23 137    | 22 509    | 1 337.8 | 1 316.5 | 1 273.4 |
| Solomon Islands                  | 56     | 57     | 62     | 23.4 | 18.2 | 16.8 | 3 665     | 3 613     | 3 869     | 1 529.2 | 1 155.2 | 1 048.5 |
| Somalia                          | 1 820  | 2 213  | 2 667  | 38.9 | 35.5 | 35.4 | 114 122   | 148 404   | 174 268   | 2 436.1 | 2 377.6 | 2 315.4 |

|                                    |        |        |        |      |      |      |           |           |           |         |         |         |
|------------------------------------|--------|--------|--------|------|------|------|-----------|-----------|-----------|---------|---------|---------|
| South Africa                       | 7 344  | 7 516  | 7 977  | 24.7 | 20.9 | 20.0 | 361 163   | 380 297   | 411 807   | 1 214.4 | 1 055.8 | 1 035.0 |
| South Sudan                        | 1 641  | 1 930  | 2 296  | 48.0 | 35.9 | 36.7 | 115 748   | 146 498   | 177 351   | 3 383.8 | 2 727.8 | 2 836.2 |
| Spain                              | 9 005  | 9 320  | 9 186  | 25.9 | 23.3 | 23.1 | 345 474   | 364 338   | 348 157   | 992.5   | 911.1   | 875.9   |
| Sri Lanka                          | 3 933  | 4 077  | 4 666  | 28.6 | 27.0 | 29.4 | 198 443   | 214 853   | 236 553   | 1 442.8 | 1 421.0 | 1 492.3 |
| Sudan                              | 8 071  | 8 536  | 9 259  | 52.7 | 43.3 | 39.5 | 448 734   | 475 962   | 508 866   | 2 927.5 | 2 417.0 | 2 171.4 |
| Suriname                           | 72     | 66     | 74     | 22.7 | 17.7 | 18.1 | 3 873     | 3 861     | 4 210     | 1 222.1 | 1 033.6 | 1 030.6 |
| Sweden                             | 1 853  | 1 850  | 1 856  | 25.6 | 23.6 | 22.8 | 77 370    | 77 631    | 78 147    | 1 067.8 | 990.2   | 961.7   |
| Switzerland                        | 1 853  | 1 881  | 1 893  | 31.4 | 28.4 | 26.5 | 79 550    | 83 653    | 84 745    | 1 348.8 | 1 261.2 | 1 187.4 |
| Syrian Arab Republic               | 3 067  | 4 084  | 3 546  | 31.7 | 30.5 | 30.0 | 166 867   | 223 873   | 184 005   | 1 723.8 | 1 673.8 | 1 557.7 |
| Tajikistan                         | 841    | 924    | 1 101  | 23.5 | 19.1 | 19.9 | 51 171    | 57 119    | 70 297    | 1 432.2 | 1 179.7 | 1 270.4 |
| Thailand                           | 16 215 | 19 042 | 19 559 | 33.9 | 35.1 | 34.4 | 899 204   | 1 083 594 | 1 104 180 | 1 879.0 | 1 995.4 | 1 943.9 |
| Timor-Leste                        | 153    | 141    | 145    | 31.4 | 22.4 | 19.5 | 11 009    | 10 321    | 10 595    | 2 258.1 | 1 642.4 | 1 421.4 |
| Togo                               | 1 062  | 1 261  | 1 382  | 38.0 | 34.3 | 31.7 | 61 552    | 74 924    | 84 386    | 2 202.5 | 2 039.3 | 1 934.2 |
| Tonga                              | 5      | 4      | 5      | 8.3  | 6.1  | 7.7  | 812       | 732       | 734       | 1 347.5 | 1 124.7 | 1 136.2 |
| Trinidad and Tobago                | 199    | 203    | 203    | 21.1 | 19.3 | 18.6 | 9 192     | 9 914     | 10 223    | 974.9   | 941.6   | 934.9   |
| Tunisia                            | 2 101  | 2 321  | 2 361  | 30.7 | 28.5 | 27.5 | 87 766    | 97 161    | 100 970   | 1 283.3 | 1 191.6 | 1 175.3 |
| Turkey                             | 22 110 | 23 255 | 22 438 | 50.4 | 44.0 | 37.6 | 1 136 939 | 1 083 095 | 1 010 894 | 2 590.6 | 2 048.6 | 1 695.8 |
| Turkmenistan                       | 627    | 679    | 767    | 21.8 | 18.9 | 19.6 | 42 365    | 50 018    | 53 227    | 1 471.9 | 1 395.0 | 1 359.0 |
| Uganda                             | 4 229  | 4 994  | 5 843  | 35.5 | 30.3 | 28.2 | 312 947   | 382 876   | 453 116   | 2 628.6 | 2 319.3 | 2 184.0 |
| Ukraine                            | 20 080 | 16 252 | 12 978 | 49.6 | 41.3 | 34.3 | 794 020   | 663 706   | 532 841   | 1 961.6 | 1 687.8 | 1 409.2 |
| United Arab Emirates               | 305    | 687    | 839    | 13.2 | 9.3  | 10.5 | 24 716    | 65 399    | 76 116    | 1 066.3 | 880.8   | 950.2   |
| United Kingdom                     | 20 963 | 21 905 | 22 686 | 43.9 | 41.8 | 41.5 | 638 095   | 650 738   | 663 041   | 1 337.5 | 1 242.9 | 1 213.6 |
| United Republic of Tanzania        | 9 059  | 9 758  | 11 319 | 49.0 | 39.9 | 38.4 | 646 712   | 719 517   | 822 583   | 3 495.3 | 2 943.3 | 2 794.3 |
| United States of America           | 68 695 | 64 900 | 67 198 | 31.1 | 26.3 | 25.7 | 2 505 083 | 2 426 189 | 2 525 864 | 1 135.7 | 984.0   | 965.7   |
| Uruguay                            | 817    | 790    | 740    | 32.6 | 30.2 | 27.3 | 34 148    | 35 249    | 34 356    | 1 363.1 | 1 348.8 | 1 269.1 |
| Uzbekistan                         | 3 299  | 3 197  | 3 289  | 21.2 | 15.8 | 14.6 | 214 646   | 235 370   | 250 523   | 1 381.4 | 1 164.8 | 1 112.7 |
| Vanuatu                            | 15     | 19     | 22     | 13.9 | 13.0 | 12.9 | 2 019     | 2 341     | 2 685     | 1 866.0 | 1 604.0 | 1 578.8 |
| Venezuela (Bolivarian Republic of) | 6 633  | 6 771  | 7 139  | 41.5 | 34.0 | 33.3 | 380 412   | 383 911   | 409 675   | 2 381.6 | 1 925.9 | 1 911.9 |
| Viet Nam                           | 16 665 | 18 840 | 21 159 | 30.5 | 28.0 | 29.4 | 876 944   | 1 014 568 | 1 161 117 | 1 603.8 | 1 510.1 | 1 611.1 |
| Yemen                              | 4 445  | 5 566  | 6 245  | 50.0 | 41.9 | 38.5 | 235 044   | 294 758   | 328 078   | 2 643.7 | 2 220.6 | 2 024.9 |
| Zambia                             | 1 635  | 1 772  | 1 849  | 29.3 | 24.7 | 20.9 | 119 941   | 138 824   | 153 483   | 2 148.7 | 1 935.7 | 1 731.8 |
| Zimbabwe                           | 1 987  | 1 783  | 1 755  | 28.9 | 24.0 | 21.8 | 108 383   | 112 813   | 124 057   | 1 574.5 | 1 521.6 | 1 542.1 |

DALYs, disability-adjusted life years.
